# Supplementary material
Source: Frontiers journal article supplement (https://www.frontiersin.org/articles/539257)
Supplement: Table_4.PDF [file Table_4.PDF]

| Mutant name            | V2 mutation        | Template used  | Primers                | Resultant binary vector |
|------------------------|--------------------|----------------|------------------------|-------------------------|
| <b>BCTV V2P1A</b>      | T43A               | pg1.2BCTV      | upV2P1A-lowV2P1A       | pg1.2BC-V2P1A           |
| <b>BCTV V2P1D</b>      | T43D               | pg1.2BCTV      | upV2P1D-lowV2P1D       | pg1.2BC-V2P1D           |
| <b>BCTV V2P2A</b>      | S72A               | pg1.2BCTV      | upV2P2A-lowV2P2A       | pg1.2BC-V2P2A           |
| <b>BCTV V2P3AA</b>     | S92A/S93A          | pg1.2BCTV      | upV2P3AA-lowV2P3AA     | pg1.2BC-V2P3AA          |
| <b>BCTV V2P2A/P3AA</b> | S72A/<br>S92A/S93A | pg1.2BC-V2P3AA | upV2P2A-lowV2P2A       | pg1.2BC-V2P2-1/P3-1     |
| <b>BCTV V2H1GG</b>     | L17G/V19G          | pg1.2BCTV      | upV2H1GG-<br>lowV2H1GG | pg1.2BC-V2H1GG          |
| <b>BCTV V2H2GG</b>     | I32G/I35G          | pg1.2BCTV      | upV2H2GG-<br>lowV2H2GG | pg1.2BC-V2H2GG          |
| <b>BCTV V2stop</b>     | Stop signal (*)    | pg1.2BCTV      | upV2stop-lowV2stop     | pg1.2BC-V2stop          |

**Table S4. Generation of point mutation in V2 in the infective BCTV clone pg1.2BCTV:** Point mutations in V2 were generated in pg1.2BCTV by the *in vitro* site-directed mutagenesis with QuikChange Lightning Site-Directed Mutagenesis kit (Stratagene, Agilent biotechnologies). Primers and template used are indicated. (\*): An AT dinucleotide was inserted after nucleotide 395 in BCTV genome, producing a premature stop signal and a truncated V2 protein of 17 aa (V2stop; MGPFRVDINFQTIQPF\*).
